# Supplementary figures and images for: Nested PCR Detection of Pythium sp. from Formalin-Fixed, Paraffin-Embedded Canine Tissue Sections
Source: MDPI journal article supplement (doi:10.3390/vetsci9080444), 2022-08-19

Original figures from Gels:

**Figure S1**

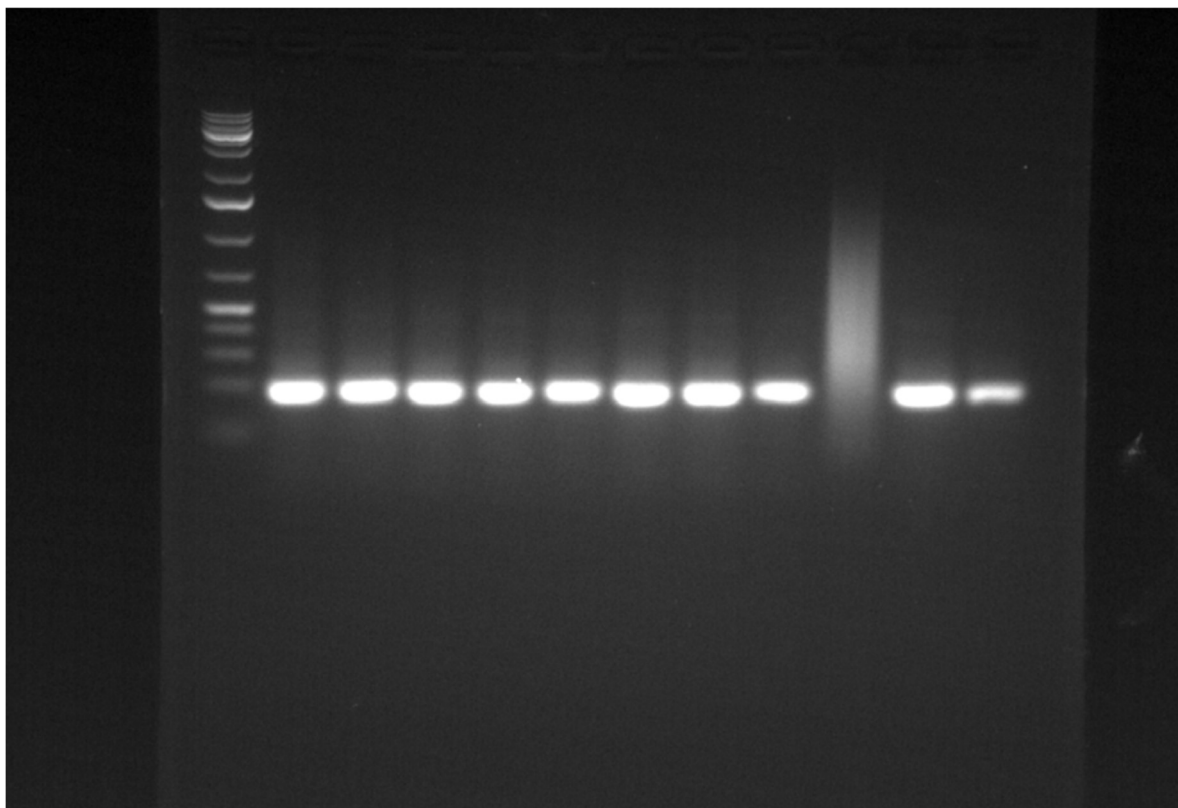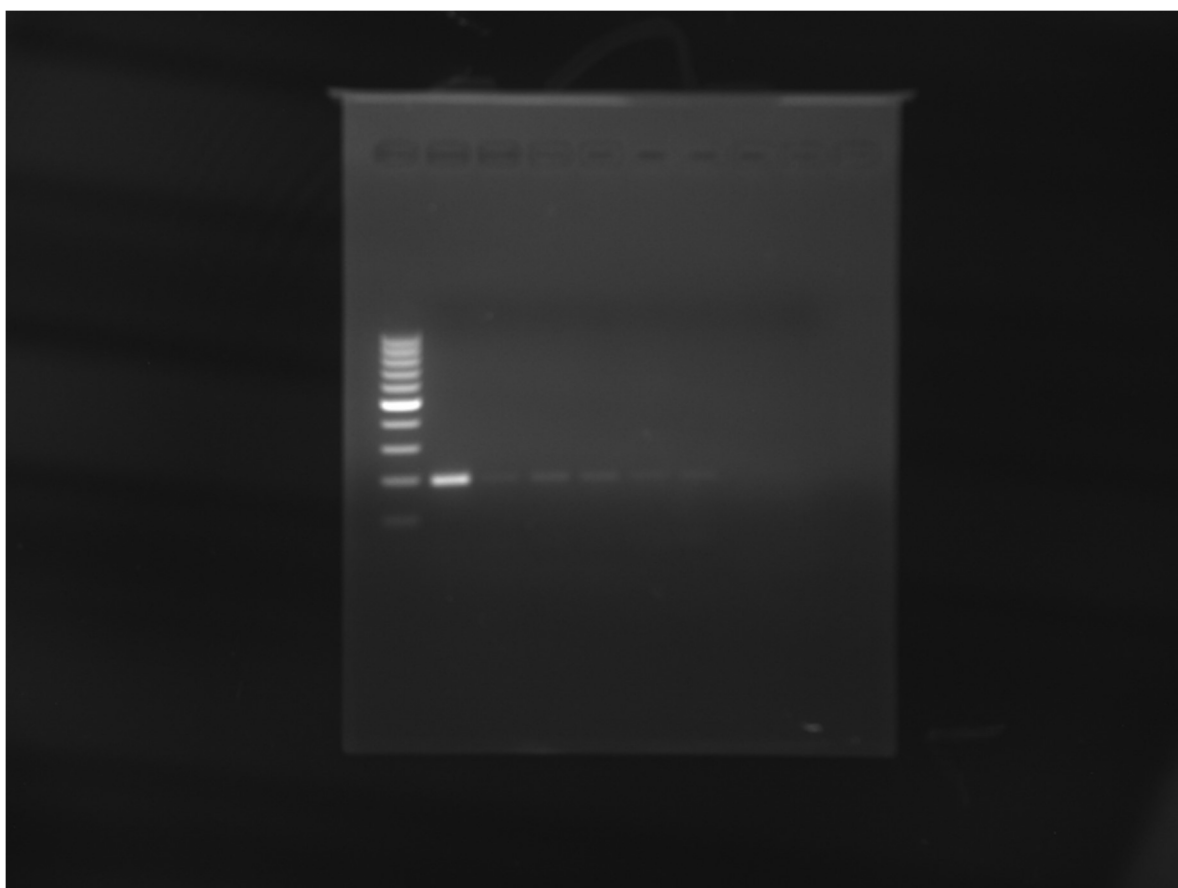

Supplement: s1 [file s1]
